# Supplementary material for: An early global role for Axin is required for correct patterning of the anterior-posterior axis in the sea urchin embryo
Source: Development. 2021 Mar 31;148(7):dev191197. doi: 10.1242/dev.191197 (PMC8034878; doi:10.1242/dev.191197)
Supplement: Supplementary information [file develop-148-191197-s1.pdf]

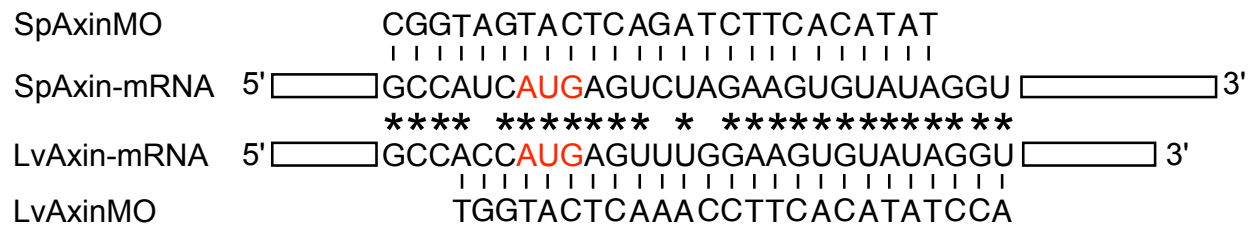

**Figure S1- The design of sea urchin Axin Morpholino (MO) antisense oligonucleotides.** Either *S. purpuratus* SpAxinMO or *L. variegatus* LvAxinMO was designed to span the start codon AUG (red) of *SpAxin* or *LvAxin* mRNA sequence respectively. Asterisks indicate the conserved nucleotides between SpAxin and LvAxin.

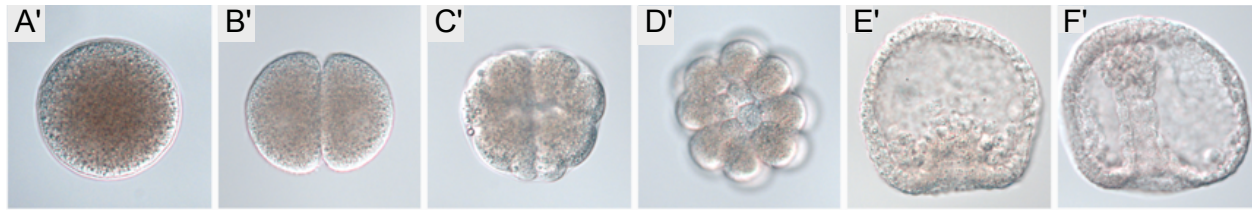

**Figure S2- No signal was detected in WMISH when *S. purpuratus* eggs and embryos were probed with sense *Axin* probe. (A) egg; (B) 2-cell stage; (C) 16-cell stage; (D) 32-cell stage (the vegetal view of embryo); (E) early gastrula embryos; (F) late gastrula embryos.**

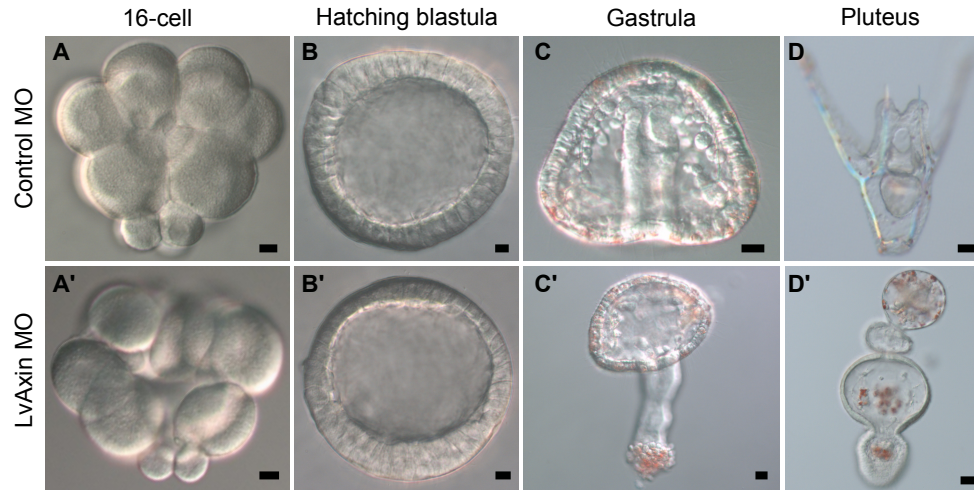

**Figure S3- The effects on Axin knockdown on *L. variegatus* development.** Axin MO was injected to zygotes to knockdown Axin protein expression. The standard Genetools control MO was injected as a negative control. At the early stages, from 16-cell to hatching blastula stage, there is no difference in morphology between embryos injected with Control MO (**A**, **B**) and embryos injected with Axin MO (**A'**, **B'**). When controls were at gastrula (**C**) and pluteus (**D**) stages the Axin-knockdown embryos showed excess endomesoderm tissues and a posteriorized phenotype (**C'**, **D'**). Scale bar = 10  $\mu$ m. The concentrations for morpholino injections was 400  $\mu$ M.

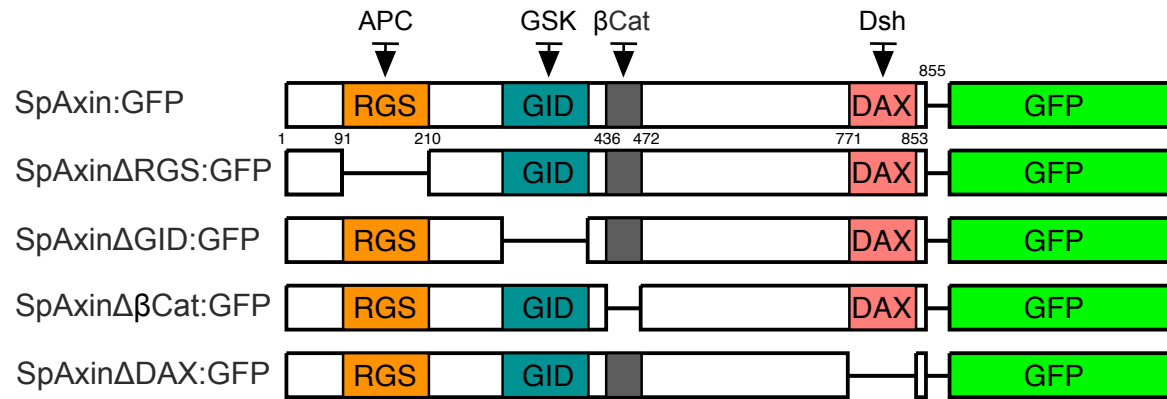

**Figure S4- Schematic representation of Axin and mutant Axin constructs.** All Axin constructs were fused to GFP.

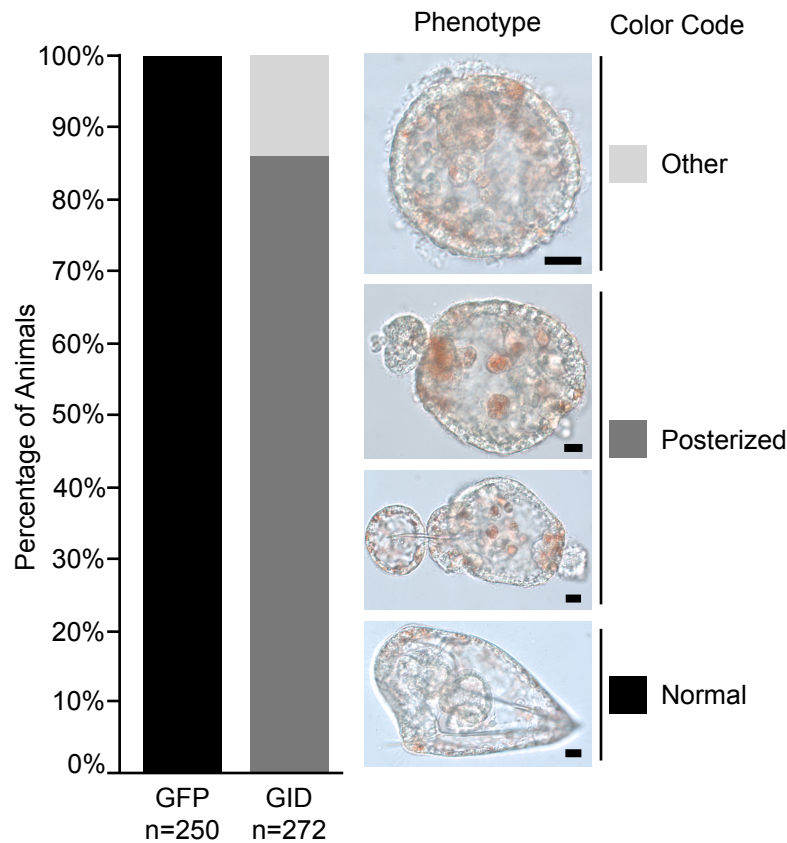

**Figure S5- Quantification of the posteriorized phenotype induced in sea urchin embryos by overexpression of Axin GID::GFP.** Left panel, bar graph shows the percentage of the different morphologies seen in GFP and Axin GID::GFP overexpressing embryos. Right panel, the morphology of the different phenotypes seen in the experiment. Color code corresponds to the colors of the bars. Scale bar = 10  $\mu$ m. Experiments were done in *S. purpuratus*.
